# Supplementary material
Source: publisher site journal article supplement (https://www.dovepress.com/article/468572)
Supplement: Supplementary file 1 [file get_supplementary_file.php]

**Supplementary materials**

**Supplementary figure 1:** Flowchart

**Supplementary appendix 1:** DiagnosesDiagnoses and procedures were defined according to the diagnosis codes in the International Statistical Classification of Diseases and Related Health Problems, tenth revision (ICD10) and surgical procedures codes according to the Nordic Medico-Statistical Committee Classification of Surgical Procedures (NOMESCO) and the Danish Health Care Classification System (SKS)

| Main analyses | ICD10 code | Nomesco or SKS code |
| --- | --- | --- |
| Mammography screening |  | UXRC45 |
| Prostate biopsy |  | KTKE00, KTKE05, KTKE10, KTKE00, KTKE05, KTKE10 |
| Cataract surgery |  | KCJA, KCJB, KCJC, KCJD, KCJE |
| Examination due to a positive fecal blood screening result | Z01.8A |  |
| Non-melanoma skin cancer | C44 |  |
| Malignant melanoma | C43 |  |
| In-hospital examination of the eye |  | ZZ7000-Z7010, ZZ7015-ZZ7051, |
| In-hospital examination of the ear |  | ZZ7052-ZZ7105 |
| Acute myocardial infarction | I21 |  |
| Stroke | I63-I66 |  |
| Diagnosis of cancer | C00-C42, C44-C97 |  |
| Low energy fracture | M48.4-M48.5, M84.3, S22.0, S22.1, S22.3, S32.0, S32.1 S32.5, S32.7, S32.8,  S42.2, S42.3, S52.2, S52.5 S52.6, S72.1, S72.2, S72.4, S72.8, S72.9, S82.1-S82.6) |  |
| Head trauma | S00-S09 |  |
